# Supplementary material
Source: PubMed Central journal article supplement (PMC3591875)
Supplement: AAC.02239-12_zac999101636so2.pdf [file AAC.02239-12_zac999101636so2.pdf]

1 **Supplementary Tables**

2 **Table S1.** Cell potency of Lambda against various HCV sub-genomic replicons

3

| HCV replicon cell line | Compound EC <sub>50</sub> |                 |
|------------------------|---------------------------|-----------------|
|                        | Lambda<br>(ng/ml)         | alfa<br>(ng/ml) |
| 1a (strain H77)        | 13 ± 5                    | 3.4 ± 0.9       |
| 1b (strain Con1)       | 4.5 ± 0.7                 | 1.4 ± 0.2       |
| 2a (strain JFH1)       | 7.7 ± 1.5                 | 0.6 ± 0.1       |
| TI <sup>a</sup>        | >450                      | >500            |

4

5 <sup>a</sup> TI = therapeutic index; Data indicate the mean EC<sub>50</sub> value ± standard deviation from at  
6 least three independent experiments.

7

8

9

10

11

12

13

14

15

16

17

18 **Table S2.** Combination activity of Lambda with ASV and DCV

19

| Experiment | Lambda<br>EC <sub>50</sub> ,<br>ng/ml | ASV<br>EC <sub>50</sub> ,<br>nM | DCV<br>EC <sub>50</sub> ,<br>nM | Combination Index (confidence interval) |                     |                     | Overall Result       |
|------------|---------------------------------------|---------------------------------|---------------------------------|-----------------------------------------|---------------------|---------------------|----------------------|
|            |                                       |                                 |                                 | 50% Effective Level                     | 75% Effective Level | 90% Effective Level |                      |
| 1          | 1.8                                   | 1.1                             | 0.004                           | 1.04 (0.95, 1.14)                       | 1.03 (0.91, 1.15)   | 1.06 (0.86, 1.25)   | Additivity / synergy |
| 2          | 0.778                                 | 0.63                            | 0.003                           | 1.05 (0.95, 1.15)                       | 0.86 (0.75, 0.98)   | 0.77 (0.61, 0.94)   | Additivity / synergy |
| 3          | 0.867                                 | 0.947                           | 0.003                           | 1.02 (0.94, 1.10)                       | 0.95 (0.85, 10.06)  | 1.00 (0.82, 1.17)   | Additivity / synergy |

20
